# Supplementary material
Source: PubMed Central journal article supplement (PMC4920304)
Supplement: rspb20152911supp1.pdf [file rspb20152911supp1.pdf]

## Supplementary information

**Authors:** Carolin L. Schultz, Anye Wamicho, Olga Tsyusko, Jason Unrine, Alison Crossley, Claus Svendsen, David J. Spurgeon

**Title:** Multigenerational exposure to silver ions and silver nanoparticles reveals heightened sensitivity and epigenetic memory in *Caenorhabditis elegans*

**Summary:** 10 pages including 7 tables and 3 figures

## Details of nanoparticle synthesis

Pristine polyvinylpyrrolidone (PVP) coated Ag-ENPs (Ag-PVP) and a sulfidised form of these particles (Ag<sub>2</sub>S) were synthesised and supplied by Jason Unrine, University of Kentucky, USA as described in Starnes et al. (2015).

### *Ag-PVP synthesis*

Polyvinylpyrrolidone (PVP) coated Ag-ENPs were prepared by a modified polyol method, for details see Cheng et al (2011) DOI: 10.1021/jp109789j.

### *Ag<sub>2</sub>S synthesis*

Ag<sub>2</sub>S-ENPs were prepared by combining the Ag-PVP ENPs with Na<sub>2</sub>S at a molar ratio of 2:1 S to Ag, brief incubation in open air and sealed for 4 days. Particles were subsequently purified by washing three times in 18 MΩ deionized water and sulfidation verified using EDX and UVvis analysis. For details see Starnes et al. (2015) Supporting Information. DOI: 10.1016/j.envpol.2014.10.009

**Supplementary Table 1:** Exposure characterisation of Ag-PVP and Ag<sub>2</sub>S ENPs over 96 h continuous exposure duration at 10 mg Ag/l in SSPW medium (pH 8.2), NTA: mean hydrodynamic diameter [nm] and zeta potential [mV]; averages ± SE

|                               | 0 h        | 24 h       | 48 h       | 72 h       | 96 h       |
|-------------------------------|------------|------------|------------|------------|------------|
| <b><i>Ag-PVP</i></b>          |            |            |            |            |            |
| NTA diameter                  | 79 ± 1     | 79 ± 4     | 92 ± 2     | 105 ± 18   | 73 ± 3     |
| ζpotential                    | -2.8 ± 0.1 | -5.1 ± 0.2 | -5.1 ± 0.6 | -3.7 ± 0.3 | -5.2 ± 0.5 |
| <b><i>Ag<sub>2</sub>S</i></b> |            |            |            |            |            |
| NTA diameter                  | 243 ± 20   | 281 ± 24   | 297 ± 22   | 281 ± 37   | 213 ± 122  |
| ζpotential                    | -2.3 ± 0.0 | -3.4 ± 0.1 | -4.1 ± 0.3 | -4.3 ± 1.1 | -5.3 ± 0.3 |

**Supplementary Table 2:** F statistic and p-values comparing logistic model fits of concentration response for the effects on reproduction in the nematode *C. elegans* of each sliver forms following continuous exposure over different numbers of multiple generations. Shaded areas and black writing indicate significant F-statistic for each response curve comparison, dark shading: p=0.01, light shading p=0.05.

|                                |         | Parent | F2    | F5    | F8    | F10   | Recovery |
|--------------------------------|---------|--------|-------|-------|-------|-------|----------|
| <u><i>AgNO<sub>3</sub></i></u> |         |        |       |       |       |       |          |
| <b>F2</b>                      | F-value | 10.747 |       |       |       |       |          |
|                                | p-value | 0.000  |       |       |       |       |          |
| <b>F5</b>                      | F-value | 10.193 | 0.149 |       |       |       |          |
|                                | p-value | 0.000  | 0.930 |       |       |       |          |
| <b>F8</b>                      | F-value | 14.140 | 0.707 | 1.083 |       |       |          |
|                                | p-value | 0.000  | 0.551 | 0.363 |       |       |          |
| <b>F10</b>                     | F-value | 6.161  | 2.035 | 1.737 | 2.092 |       |          |
|                                | p-value | 0.001  | 0.118 | 0.168 | 0.110 |       |          |
| <b>Recovery</b>                | F-value | 16.202 | 0.449 | 0.970 | 1.652 | 4.381 |          |
|                                | p-value | 0.000  | 0.719 | 0.412 | 0.186 | 0.007 |          |
| <u><i>Ag-PVP</i></u>           |         |        |       |       |       |       |          |
| <b>F2</b>                      | F-value | 14.287 |       |       |       |       |          |
|                                | p-value | 0.000  |       |       |       |       |          |
| <b>F5</b>                      | F-value | 10.553 | 2.019 |       |       |       |          |
|                                | p-value | 0.000  | 0.120 |       |       |       |          |
| <b>F8</b>                      | F-value | 23.618 | 2.112 | 2.457 |       |       |          |
|                                | p-value | 0.000  | 0.107 | 0.071 |       |       |          |
| <b>F10</b>                     | F-value | 13.586 | 7.065 | 1.472 | 6.471 |       |          |
|                                | p-value | 0.000  | 0.000 | 0.231 | 0.001 |       |          |
| <b>Recovery</b>                | F-value | 18.609 | 2.991 | 0.102 | 3.571 | 3.375 |          |
|                                | p-value | 0.000  | 0.037 | 0.958 | 0.019 | 0.024 |          |
| <u><i>Ag<sub>2</sub>S</i></u>  |         |        |       |       |       |       |          |
| <b>F2</b>                      | F-value | 0.735  |       |       |       |       |          |
|                                | p-value | 0.535  |       |       |       |       |          |
| <b>F5</b>                      | F-value | 3.838  | 5.542 |       |       |       |          |
|                                | p-value | 0.014  | 0.002 |       |       |       |          |
| <b>F8</b>                      | F-value | 2.762  | 2.428 | 4.233 |       |       |          |
|                                | p-value | 0.049  | 0.073 | 0.009 |       |       |          |
| <b>F10</b>                     | F-value | 5.574  | 7.797 | 1.308 | 3.546 |       |          |
|                                | p-value | 0.002  | 0.000 | 0.281 | 0.020 |       |          |
| <b>Recovery</b>                | F-value | 3.677  | 6.188 | 0.305 | 4.830 | 1.275 |          |
|                                | p-value | 0.017  | 0.001 | 0.822 | 0.004 | 0.292 |          |

**Supplementary Table 3:** Effect concentration for each generation corresponding to the chosen continuous exposures concentrations (AgNO<sub>3</sub>=0.1 mg Ag/l, Ag-PVP=0.9 mg Ag/l, Ag<sub>2</sub>S=15 mg Ag/l).

|                   | Parent | F2   | F5   | F8   | F10  | Recovery |
|-------------------|--------|------|------|------|------|----------|
| AgNO <sub>3</sub> | EC35   | EC66 | EC63 | EC67 | EC19 | EC70     |
| Ag-PVP            | EC25   | EC72 | EC55 | EC73 | EC13 | EC48     |
| Ag <sub>2</sub> S | EC56   | EC80 | EC55 | EC73 | EC65 | EC50     |

**Supplementary Table 4:** Results of the statistical analysis of lifespan data using GLM, with factors: generation, concentration and the interaction term generation\*concentration. Test of assumptions: Kolmogorov-Smirnov (Normality: p>0.05) and Levene's Test (Homoscedasticity: p>0.05). Comparisons of *Parent, F2-F10* were made to assess the effect of continuous exposure and of *Parent, F5, F10, Recovery* to assess the effect of the transfer into a recovery environment and subsequent re-exposure

|                                  |                  | AgNO <sub>3</sub> | Ag-PVP | Ag <sub>2</sub> S |
|----------------------------------|------------------|-------------------|--------|-------------------|
| <i>Parent, F2-F10</i>            |                  |                   |        |                   |
| Model fit                        | R <sup>2</sup>   | 15.93%            | 17.03% | 22.64%            |
|                                  | Normality        | <0.01             | <0.01  | <0.01             |
|                                  | Homoscedasticity | 0.057             | 0.087  | 0.060             |
| Generation                       | df               | 4                 | 4      | 4                 |
|                                  | p-value          | 0.286             | 0.262  | 0.262             |
|                                  | F- value         | 1.26              | 1.32   | 1.32              |
| Concentration                    | df               | 5                 | 5      | 5                 |
|                                  | p-value          | 0.006             | 0.003  | 0.000             |
|                                  | F- value         | 3.34              | 3.77   | 7.34              |
| Generation*Concentration         | df               | 20                | 20     | 20                |
|                                  | p-value          | 0.143             | 0.102  | 0.077             |
|                                  | F value          | 1.36              | 1.44   | 1.51              |
| <i>Parent, F5, F10, Recovery</i> |                  |                   |        |                   |
| Model fit                        | R <sup>2</sup>   | 10.06%            | 17.03% | 21.94%            |
|                                  | Normality        | <0.01             | <0.01  | <0.01             |
|                                  | Homoscedasticity | 0.108             | 0.073  | 0.153             |
| Generation                       | df               | 3                 | 3      | 3                 |
|                                  | p-value          | 0.816             | 0.369  | 0.219             |
|                                  | F- value         | 0.31              | 1.06   | 1.49              |
| Concentration                    | df               | 5                 | 5      | 5                 |
|                                  | p-value          | 0.492             | 0.213  | 0.001             |
|                                  | F- value         | 0.88              | 1.44   | 4.61              |
| Generation*Concentration         | df               | 15                | 15     | 15                |
|                                  | p-value          | 0.299             | 0.106  | 0.021             |
|                                  | F value          | 1.17              | 1.50   | 1.94              |

**Supplementary Table 5:** Results of the statistical analysis of lifespan data using the non-parametric Scheirer-Ray-Hare test. Comparisons of *Parent, F2-F10* were made to assess the effect of continuous exposure and of *Parent, F5, F10, Recovery* to assess the effect of the transfer into a recovery environment and subsequent re-exposure

|                                  |                        | AgNO <sub>3</sub> | Ag-PVP | Ag <sub>2</sub> S |
|----------------------------------|------------------------|-------------------|--------|-------------------|
| <i>Parent, F2-F10</i>            |                        |                   |        |                   |
| Generation                       | SS                     | 31585             | 34880  | 32355             |
|                                  | SS/MS <sub>total</sub> | 4.51              | 4.91   | 4.96              |
|                                  | df                     | 4                 | 4      | 4                 |
|                                  | p-value                | 0.341             | 0.296  | 0.292             |
| Concentration                    | SS                     | 123014            | 133811 | 212718            |
|                                  | SS/MS <sub>total</sub> | 17.57             | 18.86  | 32.59             |
|                                  | df                     | 5                 | 5      | 5                 |
|                                  | p-value                | 0.004             | 0.002  | <0.001            |
| Generation*Concentration         | SS                     | 163387            | 202878 | 177775            |
|                                  | SS/MS <sub>total</sub> | 23.33             | 28.60  | 27.23             |
|                                  | df                     | 20                | 20     | 20                |
|                                  | p-value                | 0.272             | 0.096  | 0.129             |
| <i>Parent, F5, F10, Recovery</i> |                        |                   |        |                   |
| Generation                       | SS                     | 3959              | 23634  | 17509             |
|                                  | SS/MS <sub>total</sub> | 0.90              | 5.19   | 4.23              |
|                                  | df                     | 3                 | 3      | 3                 |
|                                  | p-value                | 0.826             | 0.158  | 0.237             |
| Concentration                    | SS                     | 19464             | 38087  | 81499             |
|                                  | SS/MS <sub>total</sub> | 4.42              | 8.36   | 19.70             |
|                                  | df                     | 5                 | 5      | 5                 |
|                                  | p-value                | 0.490             | 0.137  | 0.001             |
| Generation*Concentration         | SS                     | 78376             | 108773 | 113965            |
|                                  | SS/MS <sub>total</sub> | 17.80             | 23.89  | 27.55             |
|                                  | df                     | 15                | 15     | 15                |
|                                  | p-value                | 0.272             | 0.067  | 0.025             |

**Supplementary Table 6:** Results of the statistical analysis of size data using GLM, with factors: generation, concentration and the interaction term generation\*concentration. Test of assumptions: Kolmogorov-Smirnov (Normality:  $p>0.05$ ) and Levene (Homoscedasticity:  $p>0.05$ ). Comparisons of *Parent, F2-F10* were made to assess the effect of continuous exposure and of *Parent, F5, F10, Recovery* to assess the effect of the transfer into a recovery environment and subsequent re-exposure

|                                  |                  | AgNO <sub>3</sub> | Ag-PVP | Ag <sub>2</sub> S |
|----------------------------------|------------------|-------------------|--------|-------------------|
| <i>Parent, F2-F10</i>            |                  |                   |        |                   |
| Model fit                        | R <sup>2</sup>   | 57.04%            | 61.40% | 67.98%            |
|                                  | Normality        | <0.01             | <0.01  | <0.01             |
|                                  | Homoscedasticity | <0.01             | <0.01  | <0.01             |
| Generation                       | df               | 4                 | 4      | 4                 |
|                                  | p-value          | <0.001            | <0.001 | <0.001            |
|                                  | F- value         | 129.90            | 157.96 | 265.99            |
| Concentration                    | df               | 5                 | 5      | 5                 |
|                                  | p-value          | <0.001            | <0.001 | <0.001            |
|                                  | F- value         | 55.96             | 55.50  | 53.26             |
| Generation*Concentration         | df               | 20                | 20     | 20                |
|                                  | p-value          | <0.001            | <0.001 | <0.001            |
|                                  | F value          | 9.39              | 12.00  | 3.70              |
| <i>Parent, F5, F10, Recovery</i> |                  |                   |        |                   |
| Model fit                        | R <sup>2</sup>   | 56.23%            | 59.02% | 63.27%            |
|                                  | Normality        | 0.033             | 0.041  | <0.01             |
|                                  | Homoscedasticity | <0.01             | <0.01  | <0.01             |
| Generation                       | df               | 3                 | 3      | 3                 |
|                                  | p-value          | <0.001            | <0.001 | <0.001            |
|                                  | F- value         | 80.57             | 77.59  | 182.63            |
| Concentration                    | df               | 5                 | 5      | 5                 |
|                                  | p-value          | <0.001            | <0.001 | <0.001            |
|                                  | F- value         | 88.55             | 104.62 | 69.93             |
| Generation*Concentration         | df               | 15                | 15     | 15                |
|                                  | p-value          | <0.001            | <0.001 | <0.001            |
|                                  | F value          | 4.88              | 7.44   | 5.14              |

**Supplementary Table 7:** Results of the statistical analysis of size data using the non-parametric Scheirer-Ray-Hare test. Comparisons of *Parent, F2-F10* were made to assess the effect of continuous exposure and of *Parent, F5, F10, Recovery* to assess the effect of the transfer into a recovery environment and subsequent re-exposure

|                                  |                        | AgNO <sub>3</sub> | Ag-PVP   | Ag <sub>2</sub> S |
|----------------------------------|------------------------|-------------------|----------|-------------------|
| <i>Parent, F2-F10</i>            |                        |                   |          |                   |
| Generation                       | SS                     | 12052732          | 15113990 | 15384851          |
|                                  | SS/MS <sub>total</sub> | 269.56            | 300.03   | 379.48            |
|                                  | df                     | 4                 | 4        | 4                 |
|                                  | p-value                | <0.001            | <0.001   | <0.001            |
| Concentration                    | SS                     | 4917395           | 5508812  | 3555316           |
|                                  | SS/MS <sub>total</sub> | 109.98            | 109.36   | 87.69             |
|                                  | df                     | 5                 | 5        | 5                 |
|                                  | p-value                | <0.001            | <0.001   | <0.001            |
| Generation*Concentration         | SS                     | 3837551           | 4873809  | 1158018           |
|                                  | SS/MS <sub>total</sub> | 85.83             | 96.75    | 28.56             |
|                                  | df                     | 20                | 20       | 20                |
|                                  | p-value                | <0.001            | <0.001   | 0.097             |
| <i>Parent, F5, F10, Recovery</i> |                        |                   |          |                   |
| Generation                       | SS                     | 4106488           | 4106354  | 5945045           |
|                                  | SS/MS <sub>total</sub> | 129.65            | 123.56   | 208.82            |
|                                  | df                     | 3                 | 3        | 3                 |
|                                  | p-value                | <0.001            | <0.001   | <0.001            |
| Concentration                    | SS                     | 6323310           | 7451365  | 3762621           |
|                                  | SS/MS <sub>total</sub> | 199.65            | 224.22   | 132.16            |
|                                  | df                     | 5                 | 5        | 5                 |
|                                  | p-value                | <0.001            | <0.001   | <0.001            |
| Generation*Concentration         | SS                     | 1385475           | 1917126  | 1119340           |
|                                  | SS/MS <sub>total</sub> | 43.74             | 57.69    | 39.32             |
|                                  | df                     | 15                | 15       | 15                |
|                                  | p-value                | <0.001            | <0.001   | <0.001            |

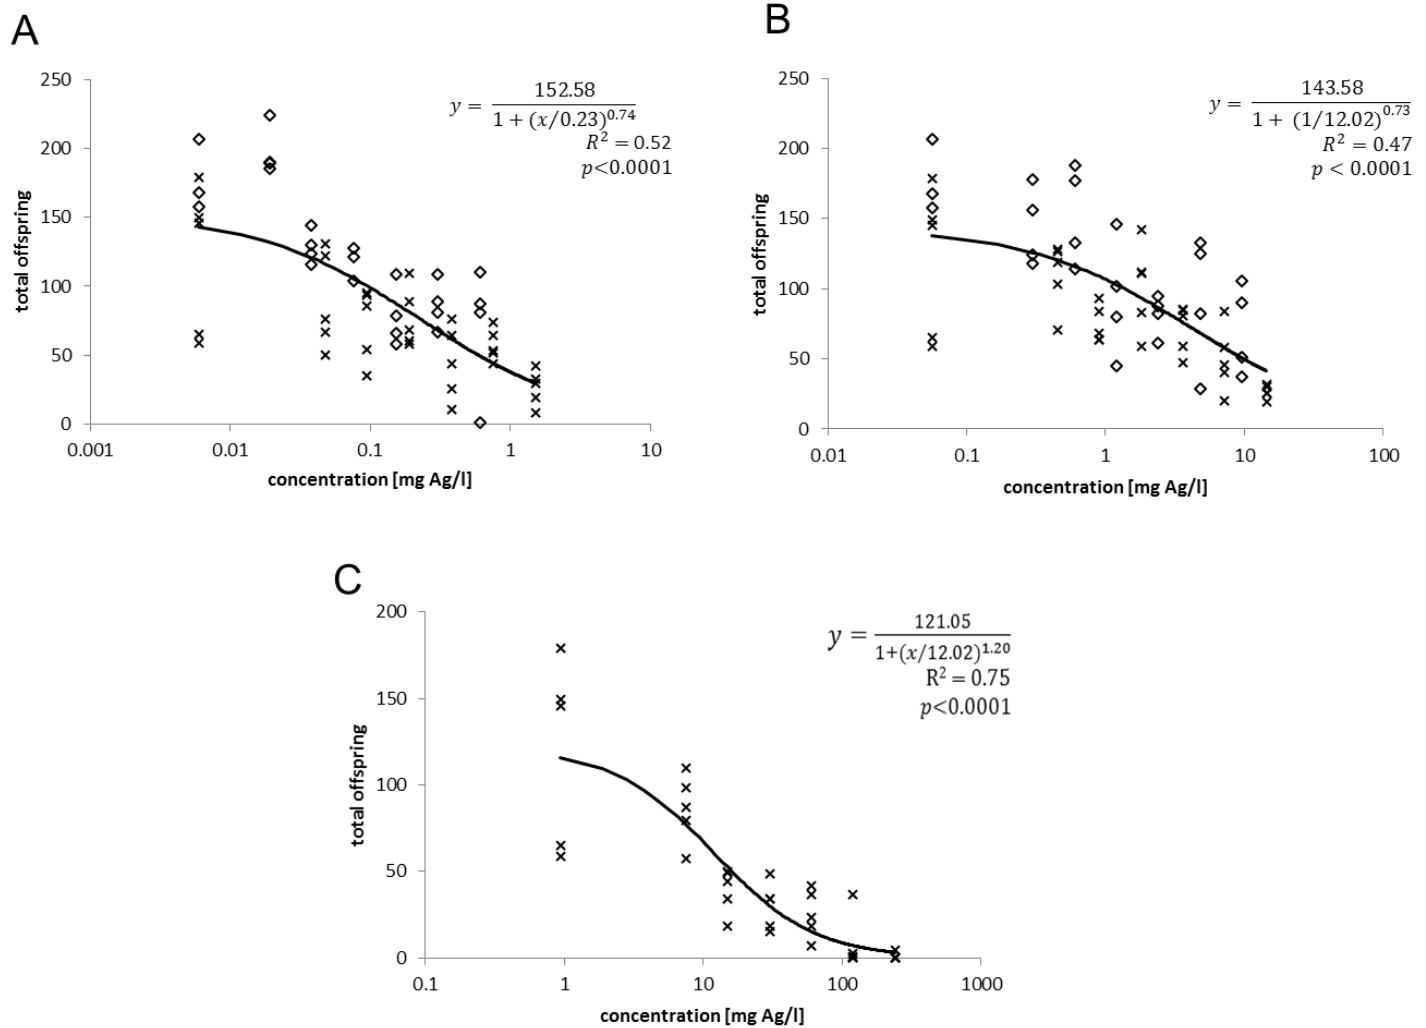

**Supplementary Figure 1:** Reproductive toxicity of a) AgNO<sub>3</sub>, b) Ag-PVP, c) Ag<sub>2</sub>S to *C. elegans*. Data points represent the total number of offspring produced by individual nematodes in response to exposure to Ag in  $\diamond$  pre-trial and x parent generation as a function of Ag exposure concentration. Lines represents 3 parameter log logistic regression fitted to combined parent and pre-trial data for AgNO<sub>3</sub>, Ag-PVP, or in parent generation for Ag<sub>2</sub>S each with corresponding regression equation, R<sup>2</sup> and p-values to show goodness of fit. Since 0 mg Ag/l cannot be displayed on log scale controls are displayed as the lowest values in each figure, i.e. for AgNO<sub>3</sub>: 0.006 mg Ag/l, Ag-PVP: 0.05 mg Ag/l, Ag<sub>2</sub>S: 0.9 mg Ag/l.



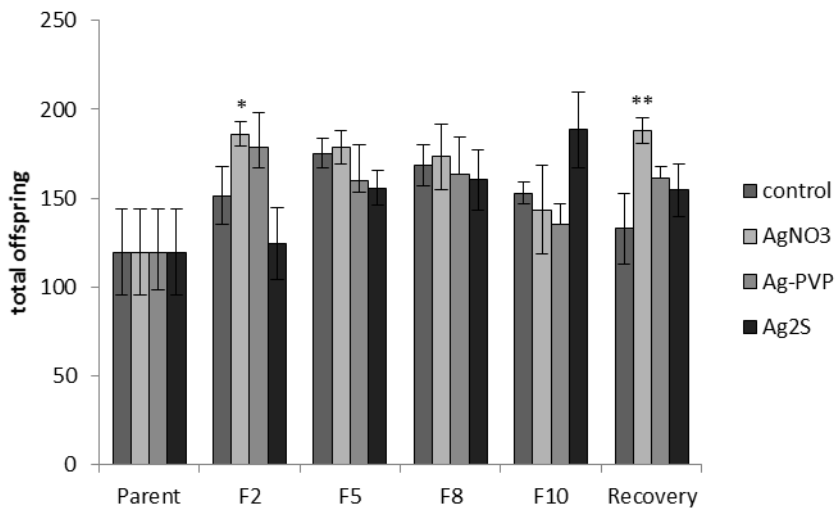

**Supplementary Figure 2:** Number of offspring produced in control (MGExp-control) for each generation after continuous exposure, average  $\pm$  SE. \* indicate significant differences of controls from continuously Ag exposed populations compared to the continuously unexposed population, \*  $p=0.05$ , \*\*  $p=0.01$ .

**A**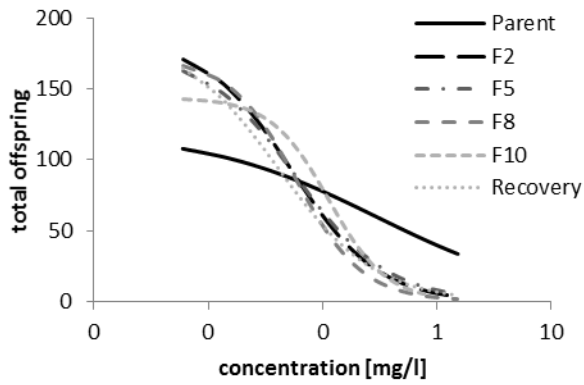**B**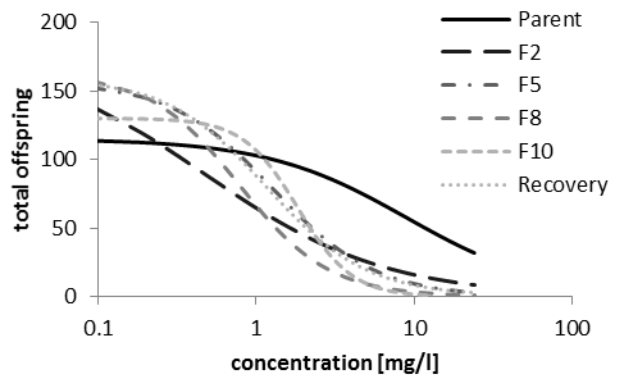**C**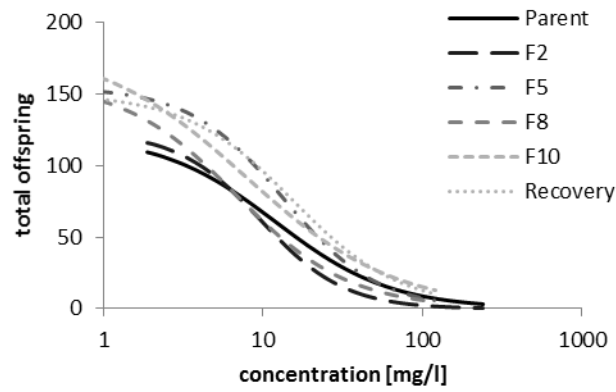

**Supplementary Figure 3:** The 3 parameter logistic regression curves of total number of offspring per adult after exposure to a)  $\text{AgNO}_3$ , b)  $\text{Ag-PVP}$ , c)  $\text{Ag}_2\text{S}$  at each of the different generations continuously exposed F2, F5, F8, F10 and the R generation.
